# Supplementary material for: TDO2+ myofibroblasts mediate immune suppression in malignant transformation of squamous cell carcinoma
Source: PubMed Central journal article supplement (PMC9525123; doi:10.1172/jci157649), 2022-10-03
Supplement: jci-132-157649-s089.pdf [file jci-132-157649-s089.pdf]

Supplementary figures and figure legends

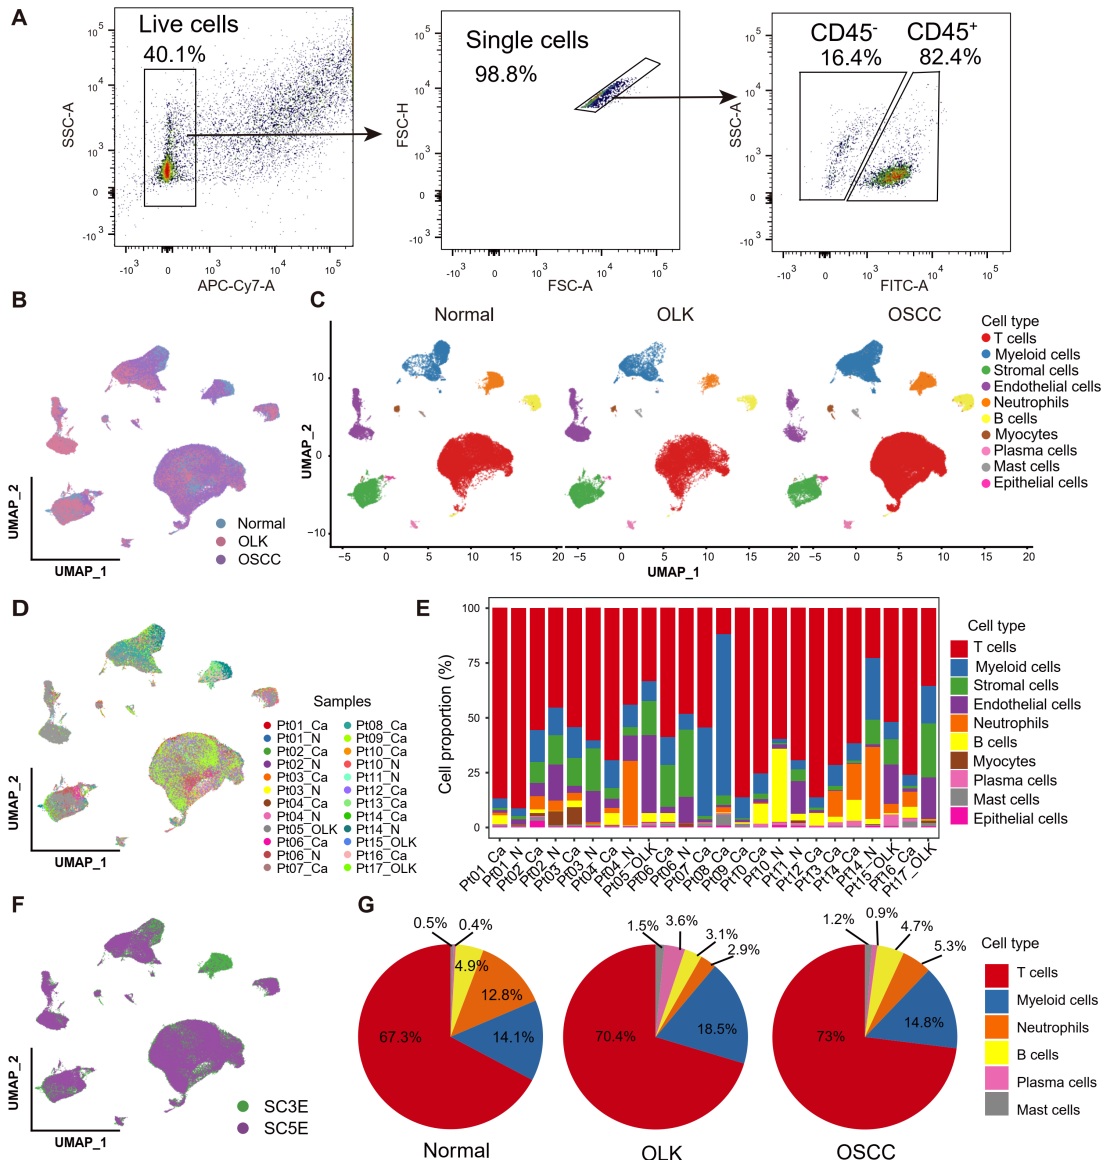

2

3 **Supplementary Figure 1. scRNA-seq analysis of 13 OSCC, 3 OLK and 8 adjacent normal samples**  
 4 **from 17 patients.**

5 (A) The proportions of CD45<sup>+</sup> (immune) and CD45<sup>-</sup> (non-immune) cells among live cells based on FACS  
 6 of the tumor tissue cell suspension after dissociation with a tumor dissociation kit. (B) UMAP colored to  
 7 indicate normal, OLK and OSCC tissues. (C) UMAP plots showing the cellular compositions of normal,  
 8 OLK and OSCC tissues. (D) UMAP plot showing the distribution of all cells in all 24 samples. Pt, patients;  
 9 Ca, OSCC tissue; OLK, leukoplakia; N, adjacent normal tissue. (E) Bar plot showing the distributions  
 10 of major cell types among 24 samples. (F) Cells were colored according to the single-cell reagent kit.  
 11 SC3E indicates the single-cell 3' reagent kit, and SC5E indicates the single-cell 5' reagent kit. (G) Pie  
 12 charts showing the percentages of each major immune cell type among the total immune cells in normal,  
 13 OLK and OSCC tissues.

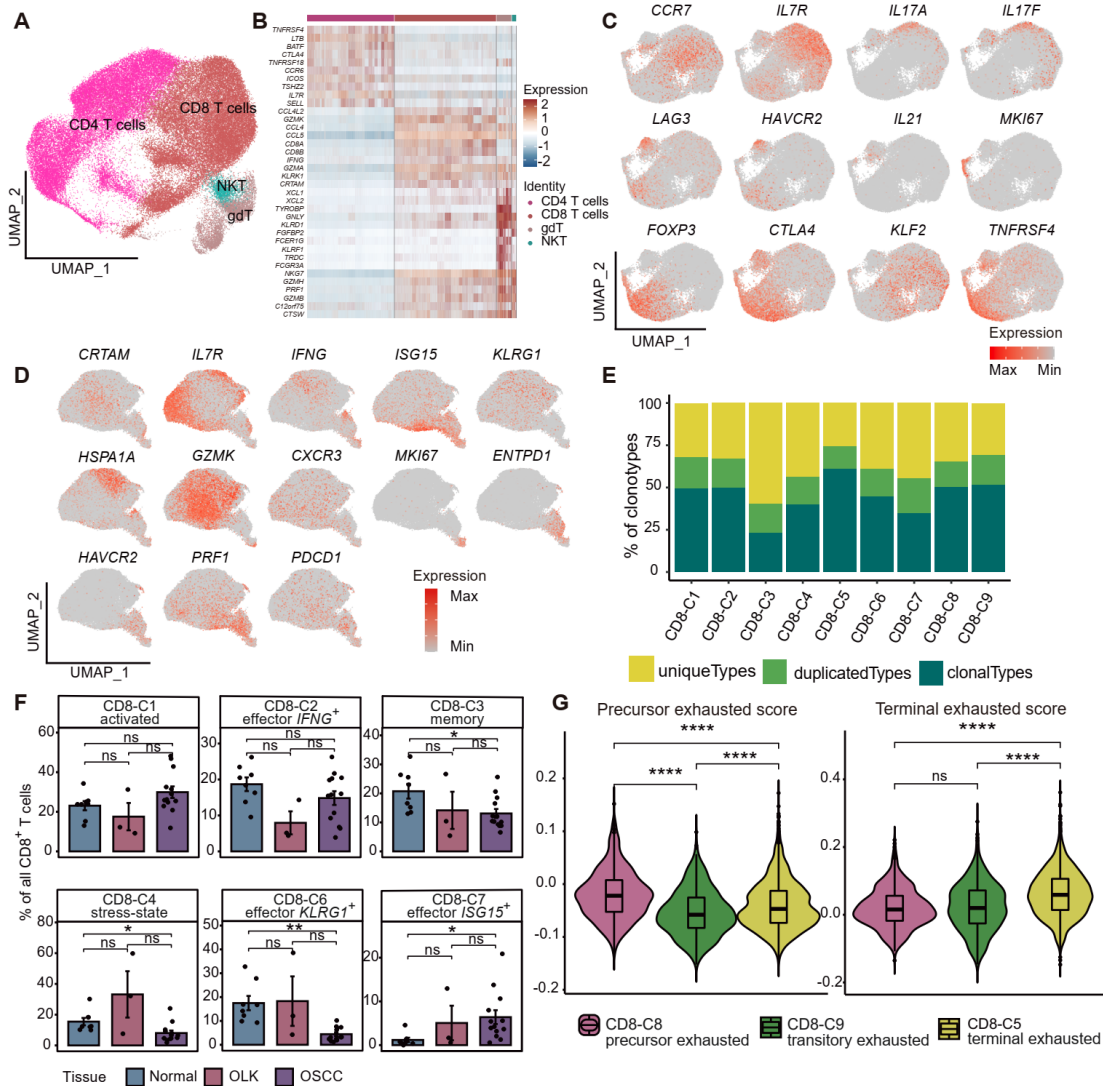

14

15 **Supplementary Figure 2. Cellular and functional characterization of CD4<sup>+</sup> and CD8<sup>+</sup> T cells.**

16 (A) UMAP plot showing the distribution of the main lineages in T cells. The color represents the T cell  
 17 lineage. (B) Heatmap showing the top 10 upregulated genes in each subset of T cells. Rows represent  
 18 genes and columns represent cells. In the heatmap, red indicates high expression, while blue indicates  
 19 low expression. Each color in the bar above the heatmap represents a T cell subset. (C) UMAP plot  
 20 showing the expression levels of specifically expressed genes in CD4<sup>+</sup> T cell subsets. The red color  
 21 indicates the higher expression level. Min indicates the minimum expression level, and Max indicates  
 22 the maximum expression level. (D) UMAP plot showing the expression levels of specifically expressed  
 23 genes in CD8<sup>+</sup> T cell subsets. (E) Bar plots showing the percentages of TCR expanded clonotypes in the  
 24 CD8<sup>+</sup> T cell subsets. (F) Bar plots showing the percentages of 6 CD8<sup>+</sup> T cell subsets among the total  
 25 CD8<sup>+</sup> T cells in adjacent normal, OLK and OSCC tissues. (G) Violin plot showing the scores of the  
 26 precursor and terminal exhaustion modules in terminal exhausted CD8<sup>+</sup> T cells (CD8-C5), precursor  
 27 exhausted CD8<sup>+</sup> T cells (CD8-C8) and transitory exhausted CD8<sup>+</sup> T cells (CD8-C9). Each color  
 28 represents a cell type. The center line of the box represents the median value, the upper and lower limits  
 29 of the box represent the 25th and 75th percentile points. (F and G) Kruskal-Wallis test followed by  
 30 Bonferroni's multiple-comparison test; \*,  $P < 0.05$ ; \*\*,  $P < 0.01$ ; \*\*\*\*,  $P < 0.0001$ ; ns, no significant  
 31 difference.

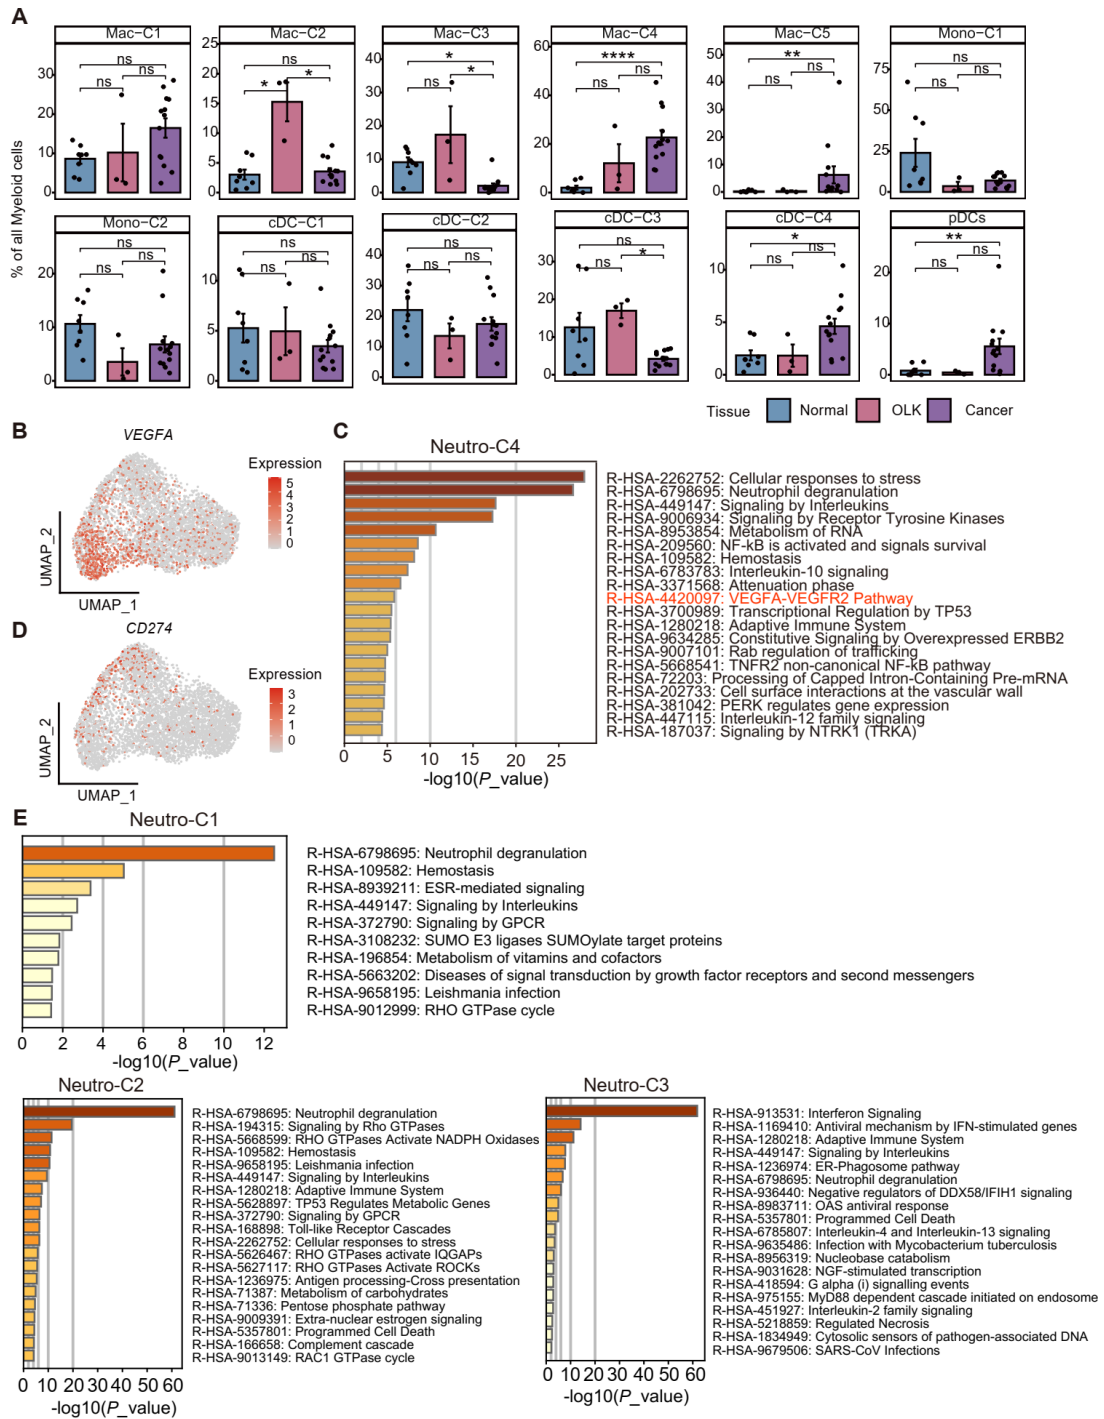

32

33 **Supplementary Figure 3. Percentages of myeloid cell subsets and characterization of neutrophil**  
 34 **subsets.**

35 (A) Bar plots showing the percentage of myeloid cell subsets among the total myeloid cells in adjacent  
 36 normal, OLK and OSCC tissues. Kruskal-Wallis test followed by Bonferroni's multiple-comparison test;  
 37 \*,  $P < 0.05$ ; \*\*,  $P < 0.01$ ; \*\*\*\*,  $P < 0.0001$ ; ns, no significant difference. (B) UMAP plot showing the  
 38 expression levels of *VEGFA* in neutrophil subsets. (C) Bar plot showing the results of the enrichment  
 39 analysis of the set of genes highly expressed in Neutro-C4 in the Reactome database, with the horizontal  
 40 coordinate representing  $-\log_{10}(P\text{-value})$ . (D) UMAP plot showing the expression levels of *CD274* in  
 41 neutrophil subsets. (E) Bar plot showing the results of the enrichment analysis of the set of genes highly

42 expressed in Neutro-C1-C3 in the Reactome database, with the horizontal coordinate representing  $-\log_{10}$   
43 ( $P$ -value). (C and E) Hypergeometric distribution;  $P < 0.01$ .  
44



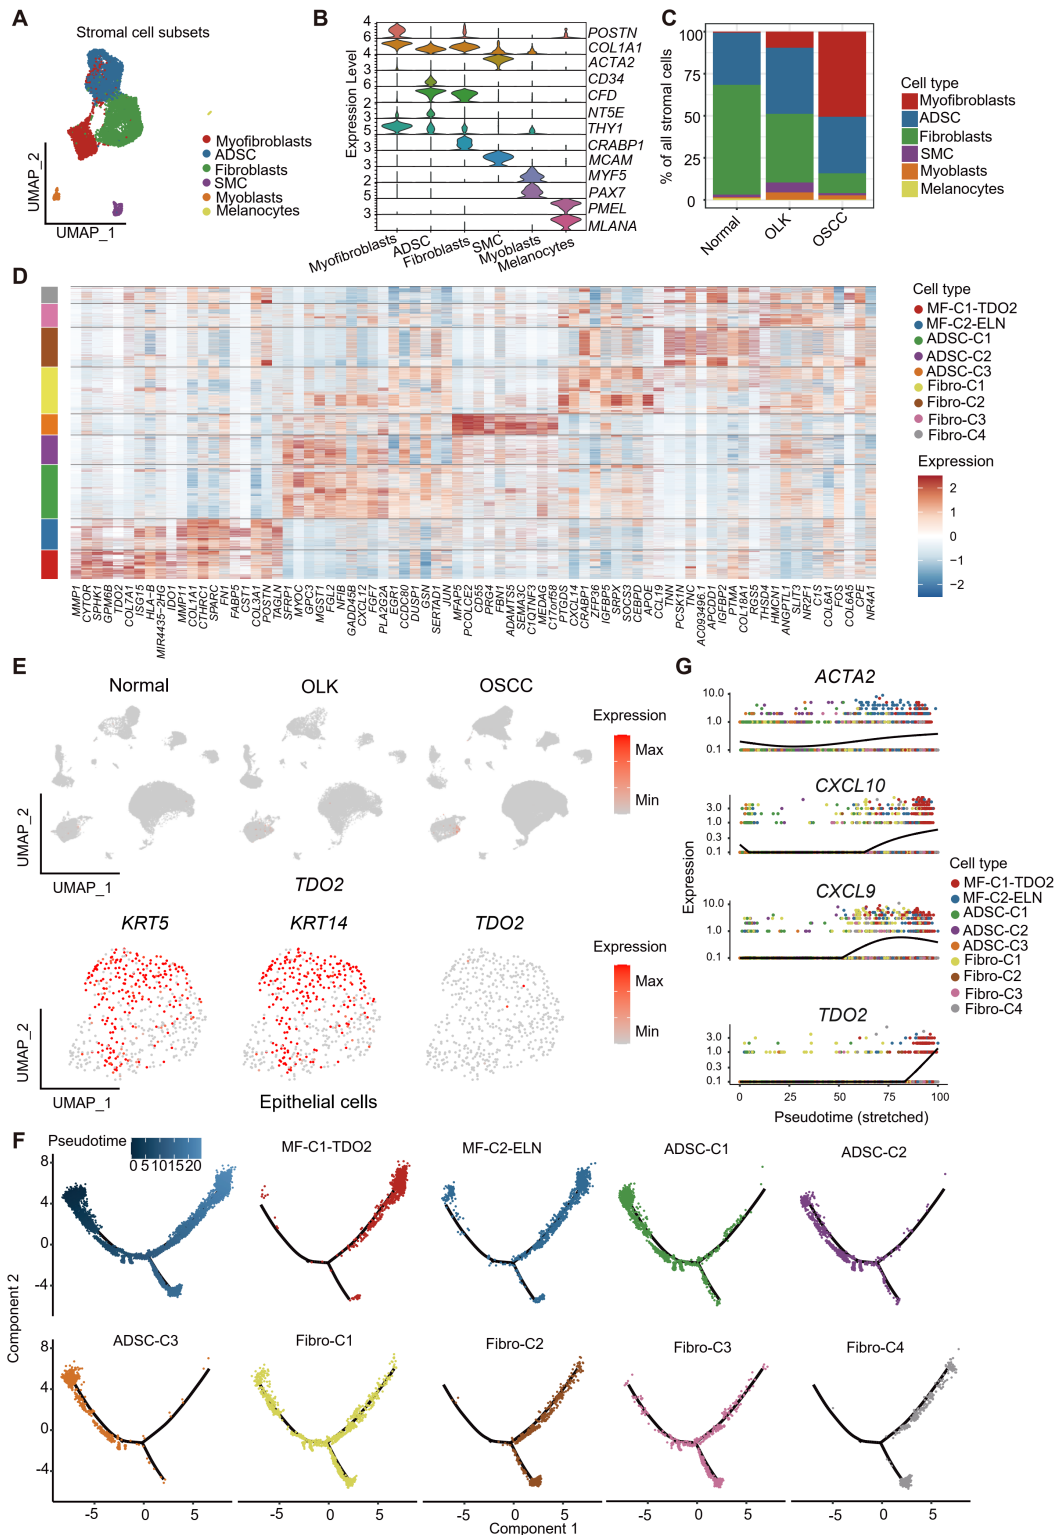

45

46 **Supplementary Figure 4. Characterization and pseudotime trajectory of stromal cell subsets.**

47 (A) UMAP plot showing the distribution of major cell types among all stromal cells. Each color  
 48 represents a major cell type. (B) Violin plot showing the expression levels of cell type markers in each  
 49 major stromal cell subset. Each color represents a gene. (C) Stacked histogram showing the percentages  
 50 of stromal cell subsets among total stromal cells of adjacent normal, OLK and OSCC tissues. (D)  
 51 Heatmap showing the expression levels of the top 10 highly expressed marker genes in each subset of

52 ADSC-Fibro-MF cells. Rows represent genes and columns represent cells; each color of the bar above  
53 the heatmap represents a cell subset. Red indicates high expression, and blue indicates low expression.  
54 **(E)** UMAP plot showing the expression levels of *TDO2* in all cells of adjacent normal, OLK and OSCC  
55 tissues (upper) and the expression levels of *KRT5*, *KRT14* and *TDO2* in epithelial cells of all tissues  
56 (lower). **(F)** The putative differentiation directions inferred from the pseudotime analysis among ADSC-  
57 Fibro-MF cells (upper left). Darker shading indicates a lower pseudotime value. The branch distribution  
58 of each subset is shown. **(G)** The expression levels of *ACTA2*, *CXCL10*, *CXCL9* and *TDO2* from the  
59 results of the pseudotime analysis of ADSC-Fibro-MF cells. Each color represents a cell subset.  
60

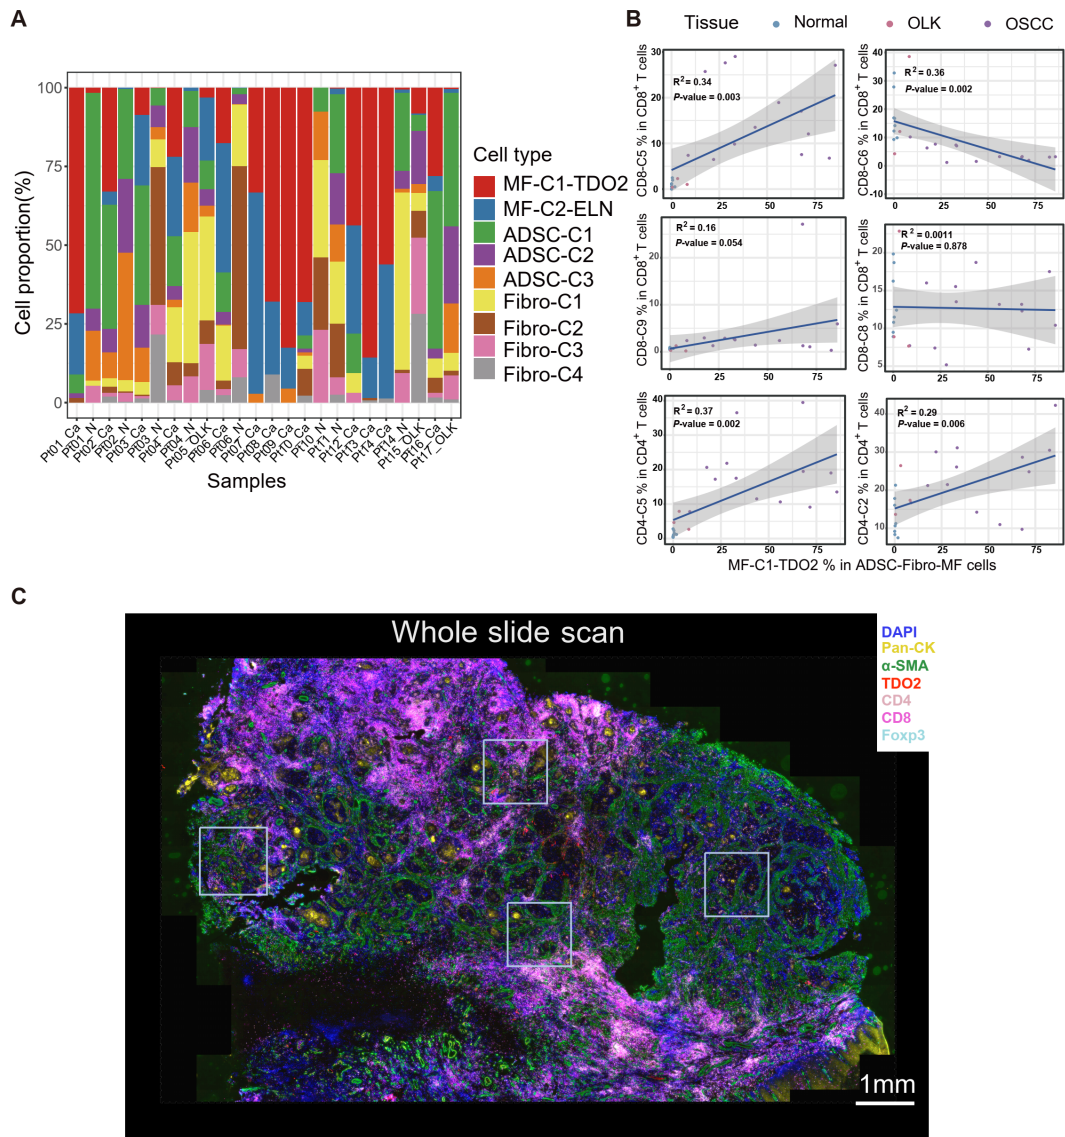

61  
62  
63  
64  
65  
66  
67  
68  
69  
70  
71

**Supplementary Figure 5. Relative proportions of ADSC-Fibro-MF cells and whole-side scan image of a mIHC slide.**

(A) Bar plot showing the distribution of ADSC-Fibro-MF cell subsets among 24 samples. Pt, patients; Ca, OSCC tissue; OLK, leukoplakia; N, adjacent normal tissue. (B) Scatter plot showing the correlation analysis between the relative abundance of MF-C1-TDO2 myofibroblasts and some T cell subsets. Each point color represents a tissue type. (C) A whole-side scan image of a multiplex immunohistochemical staining (mIHC) slide of Pt10\_Ca on the Vectra platform. We captured 4 fields per slide, resulting in a total of 40 fields from 10 whole-side scan images for further quantitative analysis. A white box represents a 10× high-powered field. Scale bar: 1 mm.



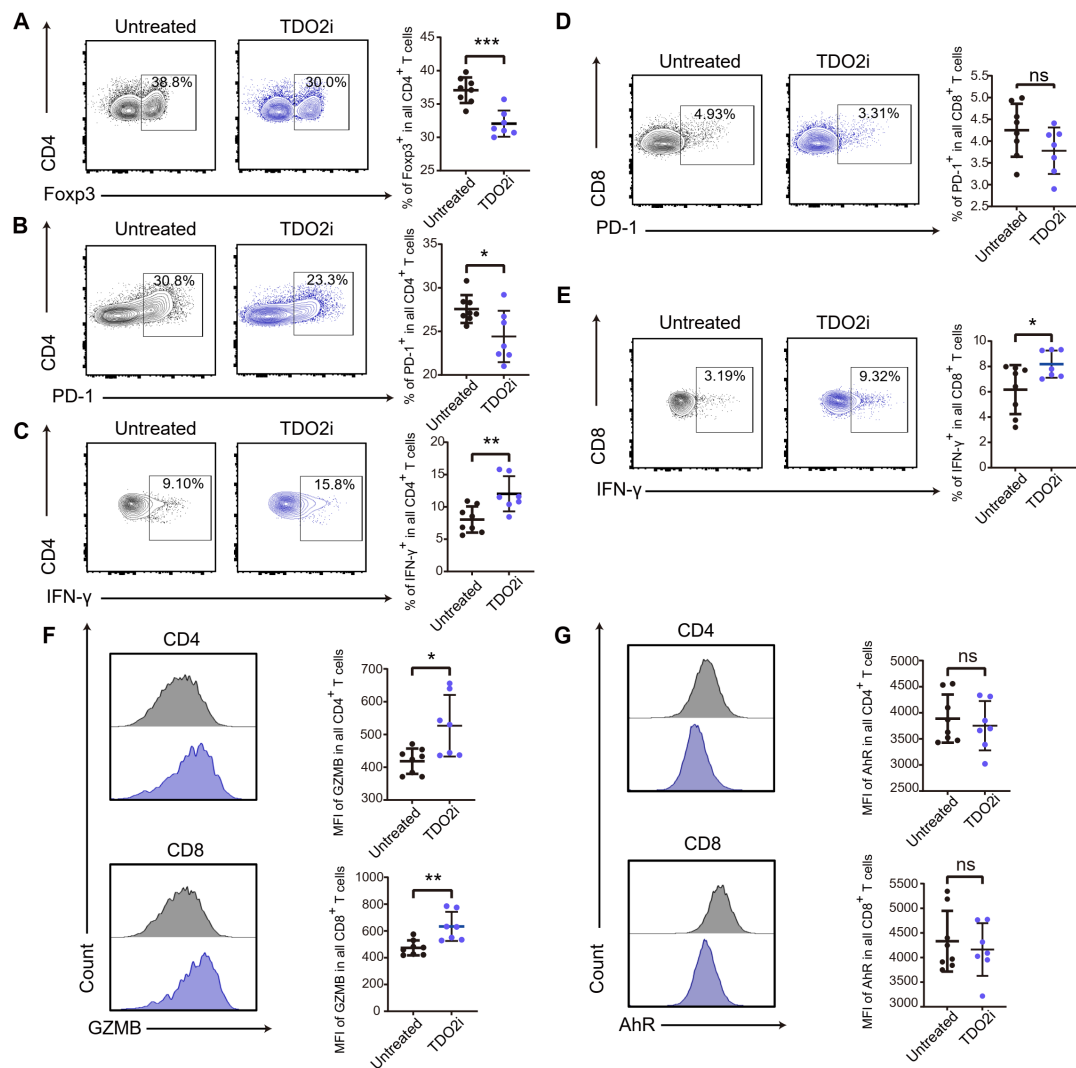

85

86 **Supplementary Figure 7. Inhibition of TDO2 attenuated the inhibitory states of T cells in draining**  
 87 **lymph nodes (dLN) in the 4NQO-induced carcinogenic murine mode.**

88 (A-C) Representative flow cytometry images (left) and statistical results (right) showing the proportions  
 89 of (A) Foxp3<sup>+</sup>, (B) PD-1<sup>+</sup> and (C) IFN-γ<sup>+</sup> CD4<sup>+</sup> T cells from dLN samples from the TDO2i and untreated  
 90 groups. (D and E) Representative flow cytometry images (left) and statistical results (right) showing the  
 91 proportions of (D) PD-1<sup>+</sup> and (E) IFN-γ<sup>+</sup> CD8<sup>+</sup> T cells from dLN samples from the TDO2i and untreated  
 92 groups. (F) Representative flow cytometry images (left) and statistical results (right) showing the median  
 93 fluorescence intensity (MFI) of GZMB in CD4<sup>+</sup> (upper) and CD8<sup>+</sup> (lower) T cells from dLN samples  
 94 from the TDO2i and untreated groups. (G) Representative flow cytometry images (left) and statistical  
 95 results (right) showing the MFI of AhR between CD4<sup>+</sup> (upper) and CD8<sup>+</sup> (lower) T cells from the TDO2i  
 96 and untreated groups. (A-G) \*,  $P < 0.05$ ; \*\*,  $P < 0.01$ ; \*\*\*,  $P < 0.001$ ; ns, no significant difference; 2-  
 97 tailed Student's  $t$  test.

98

**100 Tissue dissociation and single-cell suspensions**

101 Fresh samples were trimmed, washed with Dulbecco's phosphate-buffered saline (D-  
102 PBS; ThermoFisher Scientific, Waltham, MA), minced, and dissociated using a Human  
103 Tumor Dissociation Kit (Miltenyi Biotec, Bergisch Gladbach, Germany) according to  
104 the manufacturer guidelines. Cell suspensions were filtered by a 70 mm nylon mesh  
105 filter (ThermoFisher Scientific), and dissociated cells were pelleted and lysed with BD  
106 Pharm Lyse (BD Biosciences, Franklin Lakes, NJ). Samples were then stained with  
107 Zombie Fixable Viability Dye (Biolegend, San Diego, CA) at a 1:100 dilution for 15  
108 minutes at room temperature (RT), and washed with PBS with 2% fetal bovine serum  
109 (FBS; ThermoFisher Scientific). Cells were then stained for sorting by incubation with  
110 FITC-conjugated mouse anti-human CD45 (clone: HI30; Biolegend) at a 1:100 dilution  
111 for 30 minutes at 4 °C, spun down at  $500 \times g$  for 5 minutes, washed with cold PBS, and  
112 re-suspended with PBS for single-cell sorting. Live cells were sorted from 100  $\mu$ m flow  
113 cytometry nozzle by BD FACS AriaFusion (BD Biosciences) and the proportions of  
114 CD45<sup>+</sup> cells were recorded. Single cells were collected in pure FBS. Then all the cells  
115 were processed in less than one hour after sorting. Sorted cells were washed and re-  
116 suspended in cold PBS (containing 0.04% BSA) at  $7-12 \times 10^5$  cells/mL before loading  
117 into a Chromium Single Cell Controller.

**118 Preparation of scRNA-seq libraries and sequencing**

119 Single cell transcriptome sequencing was performed using the droplet-based 10X  
120 Genomics platform. Briefly, the single cell suspension was added to each channel in a  
121 Chromium Single Cell Controller, and cells were captured using Gel Bead Kit V3 or



122 V2 reagents based on microfluidic technology. Gel beads in emulsion (GEM) were  
123 encapsulated in oil droplets, with each GEM containing a cell, a unique cell barcode, a  
124 unique molecular identifier (UMI) and a reverse transcription reaction mixture (RT-  
125 qPCR). The captured cells were lysed in GEM. The RNA released from the cells was  
126 processed by reverse transcription in a single GEM with the addition of a barcode and  
127 UMI, with each cell possessing a unique barcode and each gene in the cell possessing  
128 a unique UMI. Subsequent reverse transcription was performed at 53 °C for 45 min,  
129 followed by 5 min at 85 °C, and then the temperature was maintained at 4 °C. The  
130 resulting cDNA was amplified and then assessed for quality using an Agilent 4200  
131 according to the manufacturers instructions. For 14 samples, single cell transcriptome  
132 libraries were constructed using Chromium Single Cell 3' Library kits. For 10 samples,  
133 single cell transcriptome libraries were constructed using 5' Library kits, and TCR-  
134 enriched libraries were generated with aliquots from each of the aforementioned  
135 cDNAs using the Chromium Single Cell V(D)J Enrichment kit. The libraries were  
136 sequenced using the Illumina NovaSeq 6000 sequencing platform.

### 137 **Raw data processing and quality control of scRNA-seq data**

138 Raw sequencing data from the 10x Genomics platform were converted to fastq format  
139 using 'CellRanger mkfastq' (v4.0.0). Next, scRNA-seq reads were aligned to the  
140 GRCh38 reference genome using 'CellRanger count' (v4.0.0).

141 To analyze the results from the above pipeline using 'CellRanger', we used the  
142 Seurat package (v.3.2.2) in R (v.3.6.3) to visualize the scRNA-seq data (1). Our initial  
143 dataset contained 153,035 cells. Stringent data quality control was conducted during

144 the downstream analysis. Only genes detected in at least 0.1% of cells were retained.  
145 We filtered the cells with the following parameters to exclude outliers: maximum  
146 percentage mito=20%, maximum number of UMIs=60,000, minimum number of  
147 nGene=300, and maximum number of nGene=7,500. Then, double cell scoring was  
148 performed using the R package scDbfFinder (v.1.4.0) to remove cells that were  
149 considered to be double cells in each sample (2).

150 After discarding poor-quality cells, a total of 131,702 cells were retained for  
151 downstream analysis. To normalize the library size effect in each cell, we scaled UMI  
152 counts using scale.factor=10,000. Following log-transformation of the data, other  
153 factors, including “percent.mt” and "nCount\_RNA", were corrected for variation  
154 regression using the ScaleData function. To eliminate batch effects, the top 3,000  
155 variable genes were extracted for run fastMNN based on the mutual nearest neighbors  
156 (MNN) method that was included in Seurat (3). We performed PCA using variably  
157 expressed genes under the “mnn” assay mode. The top 30 PCs were used for  
158 subsequent clustering and uniform manifold approximation and projection (UMAP)  
159 visualization. Forty initial clusters were identified with the FindClusters function using  
160 shared nearest neighbor modularity optimization with the clustering resolution set to  
161 1.5.

### 162 **Cell type annotation**

163 We first searched for the top differential markers for each identified cluster/sub-cluster  
164 using the FindAllMarkers function. The test method used for FindAllMarkers was the  
165 Wilcoxon rank sum test. For each cell type, we used multiple cell-type-

166 specific/enriched marker genes that were previously described in the literature to  
167 determine cellular identity. These include, but were not limited to, *CD3E*, *CD3D* and  
168 *CD3G* for T cells (4); *LYZ*, *CD14* and *CIQB* for myeloid cells (5); *DCN*, *COL1A1* and  
169 *COL3A1* for stromal cells (6); *TM4SF1*, *PECAMI* and *VWF* for endothelial cells (7);  
170 *CXCL8*, *G0S2* and *CSF3R* for neutrophils (8); *MS4A1*, *CD79A* and *CD79B* for B cells  
171 (9); *ACTA1*, *MYL1* and *MYH2* for myocytes (10); *MZB1*, *DERL3* and *IGKC* for plasma  
172 cells (11); *TPSB2*, *TPSAB1* and *CPA3* for mast cells (12); and *KRT14*, *KRT5* and *KRT17*  
173 for epithelial cells (10). Cells with expression of double-lineage genes, such as  
174 *LYZ*<sup>+</sup>*DCN*<sup>+</sup> cells and *LYZ*<sup>+</sup>*VWF*<sup>+</sup> cells, were excluded to eliminate potential doublet  
175 capture bias. We then arranged all of the identified cell types into 10 major cell sets  
176 based on their expression profiles, lineages, and functions.

#### 177 **Subclustering of T cells, myeloid cells, neutrophils and stromal cells**

178 For major cell types (T cells, myeloid cells, neutrophils and stromal cells), cells were  
179 extracted from the integrated dataset first. Next, we performed PCA using the variably  
180 expressed genes for each of the major cell type objects under the “mnn” assay mode.  
181 The top 30 PCs were used for subsequent clustering and UMAP visualization. The  
182 FindClusters function of the R package Seurat was utilized with suitable resolution to  
183 identify sub-clusters within major cell types. For T cells, we removed the low quality  
184 clusters again, as their majority of cells having greater than 15% mitochondrial RNA,  
185 under 1,000 detected transcripts, or under 400 unique genes.

#### 186 **Scored cell state signature**

187 Precursor exhausted and terminal exhausted modules of CD8<sup>+</sup> T cells were scored using

188 the AddModuleScore function of the R package Seurat. The precursor exhausted and  
189 terminal exhausted signatures were derived from previous studies (13). The precursor  
190 exhausted signature consisted of the genes *COLQ*, *OAF*, *F2RL1*, *GZMM*, *AQP3*,  
191 *GALNT14*, *SLC2A6*, *FAM81A*, *SAMD3*, *P2RX7*, *SH3BP5*, *TBC1D4*, *SSPO*, *IL18*,  
192 *LRIG1*, *TESPA1*, *SH2B3*, *FAM160A1*, *SIPR5*, *KLF3*, *CD83*, *XCL1*, *CXXC5*,  
193 *TNFRSF13B*, *ST8SIA1*, *SELL*, *DHRS3*, *DTX1*, *CD40LG*, *KCNMB1*, *WNT10A*,  
194 *SOSTDC1*, *SYNPO*, *TREML2*, *LIF*, *SIPR1*, *TNFSF8*, *TNFSF14*, *ART3*, *MAPK11*,  
195 *HECTD2*, *TNFRSF25*, *CD22*, *SLAMF6*, *ID3*, *DAPL1*, *CXCR5*, *AFF3*, *TCF7*, and *CCR6*.  
196 The terminal exhausted signature consisted of the genes *DSC2*, *RASD2*, *LTF*, *CCR1*,  
197 *HTRA3*, *LGI2*, *MGAT3*, *GLIS1*, *FCRL6*, *HAVCR2*, *CD244*, *RASSF6*, *GZMB*, *FILIP1*,  
198 *CDKN2A*, *ADAM8*, *CDH17*, *FCER1G*, *EPDR1*, *CHL1*, *IL1R2*, *CCL3*, *SPP1*, *ACOXL*,  
199 *ENTPD1*, *NEB*, *LY6G5B*, *UPP1*, *AOAH*, *MREG*, *P2RY14*, *ADORA3*, *EPAS1*, *PLXND1*,  
200 *CDKN1A*, *NPNT*, *FGL2*, *ASB2*, *PPP1R3B*, *IL10*, *GPR35*, *ADRB1*, *LAT2*, *RASL12*,  
201 *SLC13A3*, *SLC16A10*, *PRF1*, *MYO10*, *CD14*, and *CDKN2B*. For the ADSC-Fibro-MF  
202 subsets, we scored AhR activation module, which consisted of the genes *IDO1*, *IDO2*,  
203 *TDO2*, *IL4I1*, *KYNU*, and *AHR* (14, 15). The module scores were calculated using the  
204 default parameters. The R package ggplot2 (v3.3.2) was used to visualize the results.

### 205 **Inferring the differentiation trajectories of CD4<sup>+</sup> and CD8<sup>+</sup> T cells using scVelo**

206 To infer the differentiation trajectories of CD4<sup>+</sup> and CD8<sup>+</sup> T cells, we used scVelo  
207 (v0.2.2) to analyze the RNA velocity in individual cells (16). scVelo performs  
208 calculations of transcriptional dynamics based on the ratio of “unspliced” pre-mRNA  
209 and “spliced” mRNA of each gene in each cell to obtain a gene expression change rate

210 (17). Application of this method allows researchers to estimate in which direction the  
211 gene expression profile of a given cell might switch, inferring possible developmental  
212 relationships between different cell types in a tissue sample.

213 Briefly, we used the Python module ‘velocyto run10x’ (v0.17.17) to analyze the  
214 BAM files (the output files from ‘CellRanger count’) to obtain loom files, and the loom  
215 files of all samples were merged by the Python module loompy (v3.0.6). Next, we  
216 integrated Seurat meta-data with the loom files. We used the Python module anndata  
217 (v0.7.4) to import the loom files and Seurat meta-data. We extracted CD4<sup>+</sup> T cells and  
218 CD8<sup>+</sup> T cells for the RNA velocity analysis. The UMAP coordinates of CD4<sup>+</sup> and CD8<sup>+</sup>  
219 T cells were mapped to the anndata object, and RNA velocity analysis was performed  
220 in “stochastics” mode using Python module scVelo. Finally, the results of the RNA  
221 velocity analysis were visualized using the matplotlib (v3.3.1) module. The direction  
222 of the arrow indicated the possible future differentiation direction of the cells.

### 223 **TCR analysis**

224 Single-cell V(D)J sequencing data were aligned to the vdj-GRCh38 reference genome  
225 using ‘cellranger vdj’ (v4.0.0). The cellranger vdj pipeline performs V(D)J sequence  
226 assembly and paired cell-by-cell clonotype calling. The outputs of cellranger vdj  
227 include the productive nucleotide sequences and translated amino acid sequences of the  
228 CDR3 region for TCRs ( $\alpha$  and  $\beta$  chains). A clonotype was defined as the identical CDR3  
229 sequences of an  $\alpha$ - $\beta$  TCR pair. Cells with the same clonotype were identified as clonal  
230 TCRs.

231 Cells with the same clonotype ID within a CD4<sup>+</sup> or CD8<sup>+</sup> T cell subtype were

232 counted for each sample. The percentage of each expanded clonotype ( $P_{exp}$ ) was  
233 calculated as follows:

234 
$$P_{exp} = \frac{\sum_{i=1}^m n_i}{N} * 100\%$$
, in which

235  $m$ : clonotype ID with attributed cell number  $\geq 2$ ;

236  $n_i$ : attributed cell number for clonotype  $i$ ;

237  $N$ : total cell number in a subtype for a sample.

238 The mean  $P_{exp}$  value for each subtype from adjacent normal, OLK and OSCC  
239 samples was calculated and used for heatmap plotting.

#### 240 **Cell-cell interaction analysis**

241 We analyzed the cell-cell interactions of myeloid cell subsets with  $CD4^+$  and  $CD8^+$  T  
242 cells in adjacent normal, OLK and OSCC tissues, as well as the cell-cell interactions of  
243 myofibroblast subsets with  $CD4^+$  T cells,  $CD8^+$  T cells and macrophages in OSCC  
244 tissues, using the Python module cellPhonedb (v.2.0) (18). The Seurat counts file and  
245 cell type annotations were input into 'cellphonedb method statistical\_analysis'. The  
246 average expression values of a receptor by a cell type and a ligand by another cell type  
247 were considered to be the ligand-receptor interaction intensity between the 2 cell types.  
248 A null distribution of the mean of the average ligand and receptor expression in the  
249 interacting clusters was generated by randomly permuting the cluster labels of all cells  
250 with 1000 iterations. The  $P$  value for the likelihood of cell-type specificity of a given  
251 ligand-receptor complex was calculated on the basis of the proportion of the means that  
252 were as high as or higher than the actual mean. The significance threshold of cell-cell  
253 interactions was  $P$  value  $< 0.05$ . We used the R ggplot2 package (v3.3.2) to visualized



254 the results.

### 255 **Functional enrichment of differentially expressed genes (DEG)**

256 The enrichment analysis of the DEGs among the neutrophil subsets was performed  
257 using the Metascape webtool ([www.metascape.org](http://www.metascape.org)) (19). The gene sets used for the  
258 analysis were obtained from the Reactome database. *P*-values are calculated based on  
259 the accumulative hypergeometric distribution. Terms with a *P*-value < 0.01 are  
260 collected and grouped into clusters based on their membership similarities.

### 261 **Gene set variation analysis (GSVA)**

262 The Gene Set Variation Analysis R package (GSVA, v1.40.1) was applied to identify  
263 differentially expressed genes between the 2 myofibroblast subsets (20). Firstly, the  
264 gene set scores per cell were calculated for myofibroblasts by GSVA. Subsequently, the  
265 significantly enriched gene sets between the 2 myofibroblast subsets were identified  
266 and arranged using the R package limma (v3.48.0). The REACTOME gene sets in the  
267 R package msigdb were used for GSVA analysis. Only significant genes (adjusted *P* <  
268 0.05) were used for further analysis.

### 269 **Pseudotime analysis**

270 The putative differentiation trajectories among ADSCs, fibroblasts and myofibroblasts  
271 (ADSC-Fibro-MF subsets) were constructed using the R package Monocle2 (v2.20.0)  
272 (21). Firstly, the top 2000 high variable genes (HVGs) in ADSC-Fibro-MFs were  
273 extracted using the function FindVariableFeatures in Seurat v3 and set as the ordering  
274 genes for ADSC-Fibro-MF subsets. Next, the CellDataSet (CDS) of ADSC-Fibro-MF  
275 subsets was constructed using the ordering genes, and the size factors of each cell were

276 calculated using the estimateSizeFactors and estimateDispersions functions with  
277 default parameters. Next, dimension reduction of the CDS was performed using the  
278 reduceDimension function with the DDRTree method, in which the size factors and  
279 UMI of each cell were normalized by the residualModelFormulaStr algorithm. After  
280 dimensionality reduction, the cells were ordered using the orderCells function with  
281 default parameters.

### 282 **H&E staining, immunohistochemistry and immunofluorescence**

283 Parts of the dissected murine tongue lesions were harvested and fixed in 10% formalin  
284 for 24 hours, followed by sectioning into 4- $\mu$ m thick slices. The slices were then stained  
285 with H&E. The TMAs were a series of tumor samples from 142 OSCC patients, among  
286 which one 1.5 mm core of representative region from each tumor sample was selected  
287 by two certified pathologists for the construction of TMAs. The TMAs were  
288 deparaffinized and rehydrated, after which the samples were permeabilized with 0.2%  
289 Triton X-100 and incubated in 3% H<sub>2</sub>O<sub>2</sub> for 10 minutes. Next, antigen retrieval was  
290 performed under high temperature and high pressure for 15 minutes in EDTA buffer.  
291 The TMAs were then incubated with rabbit anti-human TDO2 primary antibodies at  
292 4 °C overnight. After washing the TMAs 3 times with PBS, it was incubated with goat  
293 anti-rabbit secondary antibodies for 1 hour, stained with DAB for 3 minutes, and finally  
294 counterstained with hematoxylin. The images of TMAs were captured and deposited by  
295 an Axio Scan.Z1 side scanner (Zeiss). TDO2 expression on TMAs were quantitated  
296 using H-score. H-scores were quantified following the method previously described  
297 (22). Briefly, the total percentage of TDO2 positive cells and the intensity of the TDO2

298 staining (1<sup>+</sup>, 2<sup>+</sup>, or 3<sup>+</sup>), where H-score= (%1<sup>+</sup> ×1) + (%2<sup>+</sup> ×2) + (%3<sup>+</sup> ×3). H-scores  
299 range from 0-300, as 0 representing no cell staining with the marker and 300  
300 representing every cell staining with 3<sup>+</sup>. For the cohort in the TMAs, the OSCC patients  
301 of TMAs (n =142) were classified equally into TDO2-high (H-scores ≥ 86.5; n=71) and  
302 TDO2-low (H-scores < 86.5; n=71) groups based on the median value of H-score.

303 For immunofluorescence (IF), the samples were incubated with mouse anti-human  
304 α-SMA, rabbit anti-human TDO2 or mouse anti-human MCT4 primary antibodies,  
305 followed by incubation with goat anti-mouse (dyelight 488) or goat anti-rabbit (dyelight  
306 549) secondary antibodies according to the experimental design. The samples were  
307 finally counterstained with DAPI and the results were captured and analyzed by an  
308 FV3000 Confocal Laser Scanning Microscope from Olympus Life Science Solutions.  
309 The staining and analysis results of the H&E, IHC and IF were checked by 2 certified  
310 pathologists.

### 311 **Multiplex immunohistochemistry**

312 For mIHC staining, 4-µm thick FFPE sections of OSCC tissues were stained with the  
313 Opal 7-colour fluorescent IHC Kit (PerkinElmer, Massachusetts, USA). First,  
314 deparaffinization, rehydration and permeabilization were performed on all slides,  
315 followed by 20 minutes of 10% formalin fixation and 15 minutes of Tris-EDTA antigen  
316 retrieval under high temperature and high pressure. Afterwards, the slides were  
317 incubated with primary antibodies, secondary-HRP antibodies, and Opal TSA dyes for  
318 16 hours (4 °C), 10 minutes (RT) and 20 minutes (RT), respectively. Subsequent rounds  
319 of staining consisted of antigen retrieval, primary antibodies, secondary-HRP

320 antibodies, and Opal TSA dyes. The following proteins were detected with Opal  
321 fluorophores: CD8 (opal-690), pan-CK (opal-620),  $\alpha$ -SMA (opal-540), TDO2 (opal-  
322 520), CD4 (opal-650), Foxp3 (opal-570) PD-1 (opal-570), and TIM3 (opal-650). DAPI  
323 was used for nuclear counterstaining. The slides were finally mounted with antifade  
324 reagent (AR1109, BOSTER, Wuhan, China). TissueFAXS Imaging software (v7.134)  
325 was used to capture the images and identify all markers of interest. Tumor sections from  
326 10 different patients (Pt01\_Ca, Pt04\_Ca, Pt06\_Ca, Pt07\_Ca, Pt08\_Ca, Pt09\_Ca,  
327 Pt10\_Ca, Pt12\_Ca, Pt13\_Ca and Pt14\_Ca) were stained. The 4 representative fields of  
328 the whole-slide scan images (n=10) were selected and quantitatively analyzed by  
329 StrataQuest software (TissueGnostics, v7.0.0). For the mIHC staining of murine tumors,  
330 the tumors (4MOSC2) were dissected from C57BL/6 mice and repeated the protocols  
331 above. A total of 7 tumors (4 in untreated group and 3 in TDO2i group) were used for  
332 mIHC staining. The staining protocols were performed as follows: CD8 (opal-690),  
333 pan-CK (opal-620),  $\alpha$ -SMA (opal-540), TDO2 (opal-520), CD4 (opal-650), Foxp3  
334 (opal-570), GZMB (opal-520) and TIM3 (opal-570). Three to four representative fields  
335 from the images were selected for further statistical analysis. The staining and analysis  
336 results of the mIHC were also checked by 2 certified pathologists.

### 337 **Isolation and culture of myofibroblasts from OSCC**

338 To isolate primary myofibroblasts from OSCC, OSCC tissues were immersed in PBS  
339 with an antibiotic and an antimycotic for 10 minutes. The isolation and culture  
340 processes were performed according to previously described protocols (23). In brief,  
341 the peripheral or necrotic tissues were removed and the remaining tissues were minced

342 into pieces with an average volume of 1–2 mm<sup>3</sup> using surgical scissors under sterile  
343 conditions. Tumor pieces were placed in uncoated plastic tissue culture flasks and  
344 allowed to adhere to the bottom for 2–3 minutes. Dulbeccos Modified Eagles Medium  
345 (DMEM) with 10% FBS was added to the flasks, after which they were placed in a 5%  
346 CO<sub>2</sub> incubator at 37 °C. The culture medium was replaced the next day and  
347 subsequently changed every 3 days. The myofibroblasts growing from the tumor pieces  
348 adhered to the bottom of each flask. After the myofibroblasts covered more than 80%  
349 of the bottom of each flask, the flasks were trypsinized gently and the myofibroblasts  
350 were transferred to new flasks, in which passaging was continued. The remaining tissue  
351 samples were cultured and isolated repeatedly. All myofibroblasts used in the  
352 experiments were passaged fewer than 6 times.  
353

354 **References**

355

356 1. Stuart T, et al. Comprehensive integration of single-cell data. *Cell*.  
357 2019;177(7):1888-1902.e21.

358 2. Germain PL, et al. pipeComp, a general framework for the evaluation of  
359 computational pipelines, reveals performant single cell RNA-seq preprocessing  
360 tools. *Genome Biol*. 2020;21(1):227.

361 3. Haghverdi L, et al. Batch effects in single-cell RNA-sequencing data are  
362 corrected by matching mutual nearest neighbors. *Nat Biotechnol*.  
363 2018;36(5):421-427.

364 4. Guo X, et al. Global characterization of T cells in non-small-cell lung cancer by  
365 single-cell sequencing. *Nat Med*. 2018;24(7):978-985.

366 5. Cheng S, et al. A pan-cancer single-cell transcriptional atlas of tumor infiltrating  
367 myeloid cells. *Cell*. 2021;184(3):792-809.e23.

368 6. Sathe A, et al. Single-cell genomic characterization reveals the cellular  
369 reprogramming of the gastric tumor microenvironment. *Clin Cancer Res*.  
370 2020;26(11):2640-2653.

371 7. Kalucka J, et al. Single-cell transcriptome atlas of murine endothelial cells. *Cell*.  
372 2020;180(4):764-779.e20.

373 8. Zilionis R, et al. Single-cell transcriptomics of human and mouse lung cancers  
374 reveals conserved myeloid populations across individuals and species. *Immunity*.  
375 2019;50(5):1317-1334.e10.

376 9. Cillo AR, et al. Immune landscape of viral- and carcinogen-driven head and



- 377 neck cancer. *Immunity*. 2020;52(1):183-199.e9.
- 378 10. Puram SV, et al. Single-cell transcriptomic analysis of primary and metastatic  
379 tumor ecosystems in head and neck cancer. *Cell*. 2017;171(7):1611-1624.e24.
- 380 11. Xing X, et al. Decoding the multicellular ecosystem of lung adenocarcinoma  
381 manifested as pulmonary subsolid nodules by single-cell RNA sequencing. *Sci*  
382 *Adv*. 2021;7(5):eabd9738.
- 383 12. Jin S, et al. Single-cell transcriptomic analysis defines the interplay between  
384 tumor cells, viral infection, and the microenvironment in nasopharyngeal  
385 carcinoma. *Cell Res*. 2020;30(11):950-965.
- 386 13. Kallies A, et al. Precursor exhausted T cells: key to successful immunotherapy?  
387 *Nat Rev Immunol*. 2020;20(2):128-136.
- 388 14. Liu Y, et al. Tumor-repopulating cells induce PD-1 expression in CD8(+) T cells  
389 by transferring kynurenine and AhR activation. *Cancer Cell*. 2018;33(3):480-  
390 494.e7.
- 391 15. Sadik A, et al. IL4I1 is a metabolic immune checkpoint that activates the AHR  
392 and promotes tumor progression. *Cell*. 2020;182(5):1252-1270.e34.
- 393 16. Bergen V, et al. Generalizing RNA velocity to transient cell states through  
394 dynamical modeling. *Nat Biotechnol*. 2020;38(12):1408-1414.
- 395 17. La Manno G, et al. RNA velocity of single cells. *Nature*. 2018;560(7719):494-  
396 498.
- 397 18. Efremova M, et al. CellPhoneDB: inferring cell-cell communication from  
398 combined expression of multi-subunit ligand-receptor complexes. *Nat Protoc*.

- 399 2020;15(4):1484-1506.
- 400 19. Zhou Y, et al. Metascape provides a biologist-oriented resource for the analysis  
401 of systems-level datasets. *Nat Commun.* 2019;10(1):1523.
- 402 20. Hanzelmann S, et al. GSVA: gene set variation analysis for microarray and  
403 RNA-seq data. *BMC Bioinformatics.* 2013;14:7.
- 404 21. Trapnell C, et al. The dynamics and regulators of cell fate decisions are revealed  
405 by pseudotemporal ordering of single cells. *Nat Biotechnol.* 2014;32(4):381-  
406 386.
- 407 22. Finn RS, et al. Estrogen receptor, progesterone receptor, human epidermal  
408 growth factor receptor 2 (HER2), and epidermal growth factor receptor  
409 expression and benefit from lapatinib in a randomized trial of paclitaxel with  
410 lapatinib or placebo as first-line treatment in HER2-negative or unknown  
411 metastatic breast cancer. *J Clin Oncol.* 2009;27(24):3908-3915.
- 412 23. Wheeler SE, et al. Enhancement of head and neck squamous cell carcinoma  
413 proliferation, invasion, and metastasis by tumor-associated fibroblasts in  
414 preclinical models. *Head Neck.* 2014;36(3):385-392.
- 415
